# Supplementary material for: Preparation and Surface Characterization of Chitosan-Based Coatings for PET Materials
Source: MDPI journal article supplement (doi:10.3390/molecules28052375), 2023-03-04
Supplement: s1 [file s1]

# Preparation and Surface Characterization of Chitosan-Based Coatings for PET Materials

Klaudia Szafran <sup>1,\*</sup>, Małgorzata Jurak <sup>1</sup>, Robert Mrocza <sup>2</sup> and Agnieszka Ewa Wiącek <sup>1,\*</sup>

<sup>1</sup> Department of Interfacial Phenomena, Institute of Chemical Sciences, Faculty of Chemistry, Maria Curie-Skłodowska University, 20031 Lublin, Poland

<sup>2</sup> Laboratory of X-ray Optics, Department of Chemistry, Institute of Biological Sciences, Faculty of Medicine, The John Paul II Catholic University of Lublin, 20708 Lublin, Poland

\* Correspondence: klaudia.wozniak@poczta.umcs.lublin.pl (K.S.); agnieszka.wiacek@mail.umcs.pl (A.E.W.)

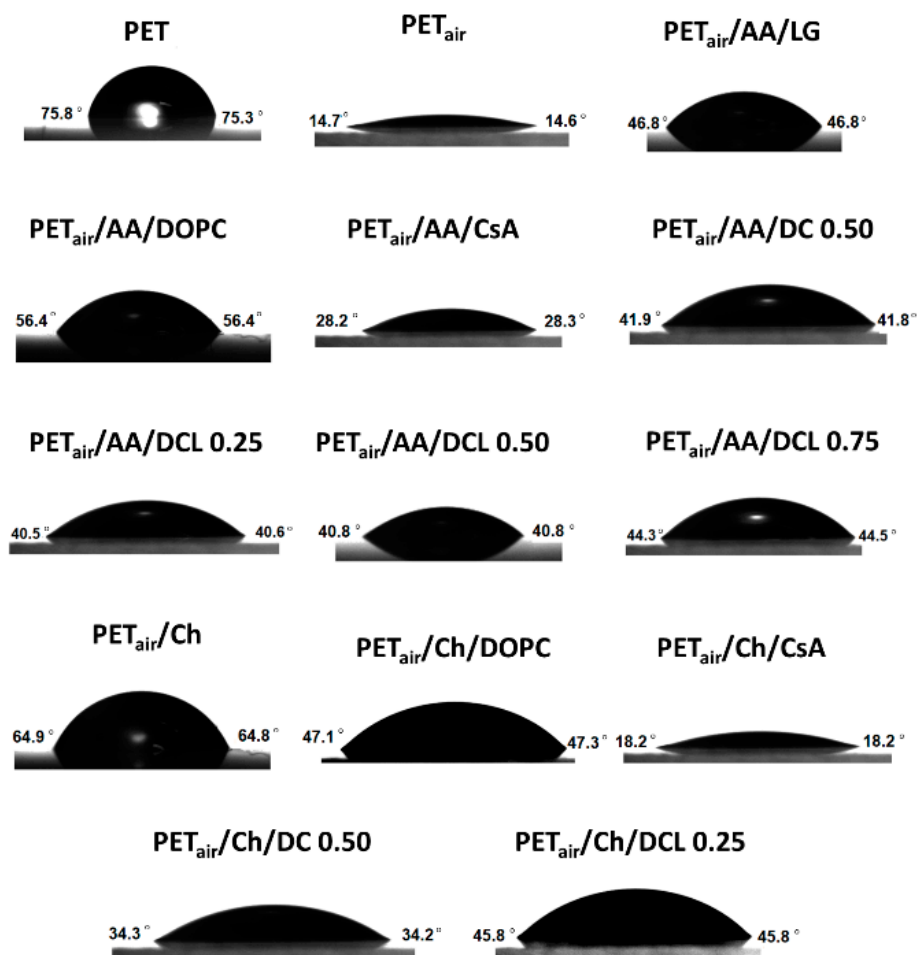

**Figure S1.** Water contact angle images for the indicated LB films deposited on PET<sub>air</sub>.

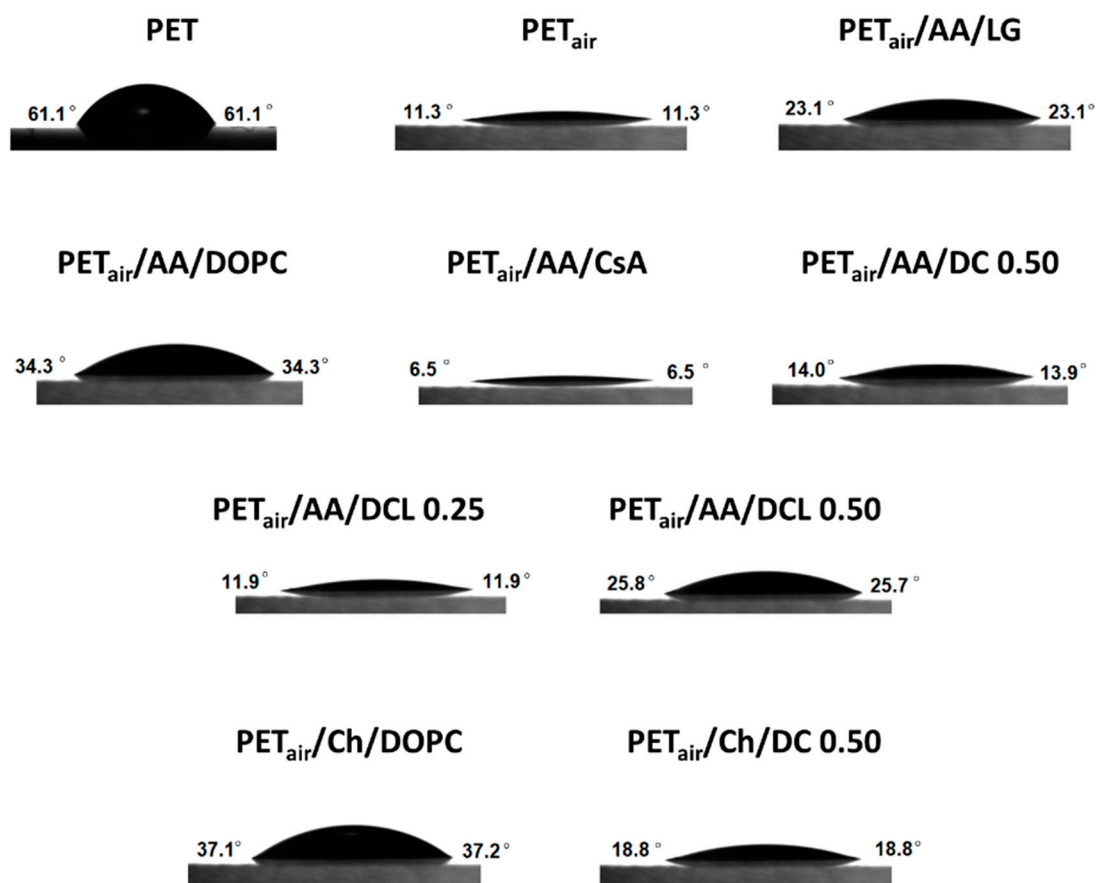

**Figure S2.** Formamide contact angle images for the indicated LB films deposited on PET<sub>air</sub>.
